# Supplementary material for: Iron catalyzed oxidative cyanation of tertiary amines
Source: Royal Society of Chemistry journal article supplement (doi:10.1039/b910548d), 2009-01-01

– Electronic Supplementary Material (ESI) –

## **Iron Catalyzed Oxidative Cyanation of Tertiary Amines**

Wei Han and Armin R. Ofial\*

*Department Chemie und Biochemie  
Ludwig-Maximilians-Universität München  
Butenandtstraße 5-13 (Haus F)  
81377 München (Germany)  
Fax: (+49) 89-2180-9977715  
E-mail: ofial@lmu.de*

**General.** All reactions were carried out under an atmosphere of dry nitrogen.  $^1\text{H}$  and  $^{13}\text{C}$  NMR spectra of solutions in  $\text{CDCl}_3$  were recorded on 200, 300, or 400 MHz NMR spectrometers. Chemical shifts were expressed in parts per million (ppm) downfield from tetramethylsilane and refer to the solvent signals ( $\delta_{\text{H}}$  7.24 and  $\delta_{\text{C}}$  77.0 ppm). Abbreviations for signal couplings are: s, singlet; d, doublet; t, triplet; m, multiplet. HRMS was performed on a Finnigan MAT 95Q mass spectrometer. Infrared spectra of neat substances were recorded on a Perkin-Elmer Spectrum BX II FT-IR spectrometer equipped with an ATR probe (diamond).

**Materials.** Commercially available tertiary amines were used as received. *N,N*-Dimethyl-*p*-anisidine,<sup>S1</sup> 1-phenylpiperidine,<sup>S2</sup> 2-phenyl-1,2,3,4-tetrahydroisoquinoline<sup>S2</sup> and 2-(4-methoxyphenyl)-1,2,3,4-tetrahydroisoquinoline<sup>S2</sup> were prepared according to literature procedures.

The following iron and copper salts were used: Iron(II) acetate (anhydrous, 97 %, Strem), iron(III) acetylacetonate (99.9 %, Aldrich), iron(III) bromide (99 %, ABCR), iron(II) chloride (98 %, Aldrich), iron(III) chloride (anhydrous, 97 %, Grüssing), iron(III) chloride hexahydrate (99 %), iron(II) fluoride (anhydrous, 99 %, Strem), iron(II) gluconate hydrate (purum p.a., Fluka), iron(II) sulfate (99 %), copper(I) bromide (98 %, Acros), and copper(II) bromide (> 99%, Acros).

Trimethylsilyl cyanide (98 %, Acros) and *tert.*-butyl hydroperoxide (5.5 M solution in decane, purum, Aldrich) were purchased.

**Typical Procedure for Iron-Catalyzed Cyanation of Tertiary Amines.** Under an atmosphere of dry  $\text{N}_2$ , a 25 mL Schlenk flask was charged with iron(II) chloride (10 mol-%, 13 mg). The tertiary amine (1.0 mmol), trimethylsilyl cyanide (2.0 mmol, 0.27 mL), and MeOH (2.0 mL) were added successively by syringe. To the mixture was added dropwise *tert.*-butyl hydroperoxide (2.5 mmol, 0.470 mL, 5.5 M solution in decane) over a period of 5 min. The mixture was stirred at room temperature for the indicated time. At the end of the reaction, the reaction mixture was poured into a saturated aqueous NaCl solution (20 mL) and extracted with  $\text{CH}_2\text{Cl}_2$  ( $3 \times 20$  mL). The organic phases were combined, and the volatile components were evaporated in a rotary evaporator. The crude product was purified by column chromatography on silica gel (*n*-pentane/diethyl ether = 15:2, v/v).

---

(S1) J. A. Hodges and R. T. Raines, *Org. Lett.*, 2006, **8**, 4695-4697.

(S2) Z. P. Li, S. D. Bohle and C. J. Li, *Proc. Natl. Acad. Sci. USA*, 2006, **103**, 8928–8933.

### **[(4-Methoxyphenyl)-methyl-amino]acetonitrile**

Known compound; the NMR spectroscopic data agree with those given in lit.<sup>S3</sup>.  $\delta_{\text{H}}(\text{CDCl}_3, 400 \text{ MHz})$  2.90 (s, 3 H), 3.76 (s, 3 H), 4.06 (s, 2 H), 6.86 ppm (s, 4 H);  $\delta_{\text{C}}(\text{CDCl}_3, 100 \text{ MHz})$  39.9, 43.9, 55.5, 114.7, 115.4, 117.8, 142.1, 154.3 ppm; HRMS  $m/z$  (EI) 176.0944,  $\text{C}_{10}\text{H}_{12}\text{N}_2\text{O}$  requires 176.0950.

### **(Methyl-*p*-tolyl-amino)acetonitrile**

Known compound; the NMR spectroscopic data agree with those given in lit.<sup>S3</sup>.  $\delta_{\text{H}}(\text{CDCl}_3, 300 \text{ MHz})$  2.29 (s, 3 H), 2.96 (s, 3 H), 4.12 (s, 2 H), 6.80 (d,  $J$  8.5 Hz, 2 H), 7.12 ppm (d,  $J$  8.5 Hz, 2 H);  $\delta_{\text{C}}(\text{CDCl}_3, 100 \text{ MHz})$  20.3, 39.4, 42.7, 115.3, 115.4, 129.8, 129.9, 145.6 ppm; HRMS  $m/z$  (EI) 160.0990,  $\text{C}_{10}\text{H}_{12}\text{N}_2$  requires 160.1001.

### **(Methyl-*m*-tolyl-amino)acetonitrile**

Known compound; the NMR spectroscopic data agree with those given in lit.<sup>S3</sup>.  $\delta_{\text{H}}(\text{CDCl}_3, 300 \text{ MHz})$  2.31 (s, 3 H), 2.98 (s, 3 H), 4.25 (s, 2 H), 6.66-6.68 (m, 2 H), 6.74 (d,  $J$  6.0 Hz, 1 H), 7.16-7.22 ppm (m, 1 H);  $\delta_{\text{C}}(\text{CDCl}_3, 100 \text{ MHz})$  21.8, 39.2, 42.3, 112.0, 115.5, 115.6, 121.1, 129.2, 139.2, 147.8 ppm; HRMS  $m/z$  (EI) 160.0990,  $\text{C}_{10}\text{H}_{12}\text{N}_2$  requires 160.1001.

### **(Methyl-*o*-tolyl-amino)acetonitrile**

Known compound; the NMR spectroscopic data agree with those given in lit.<sup>S3</sup>.  $\delta_{\text{H}}(\text{CDCl}_3, 300 \text{ MHz})$  2.29 (s, 3 H), 2.85 (s, 3 H), 3.84 (s, 2 H), 7.03-7.09 (m, 1 H), 7.17-7.22 ppm (m, 3 H);  $\delta_{\text{C}}(\text{CDCl}_3, 100 \text{ MHz})$  17.7, 41.0, 45.0, 115.6, 120.6, 124.9, 126.8, 131.3, 132.8, 148.4 ppm; HRMS  $m/z$  (EI) 160.0995,  $\text{C}_{10}\text{H}_{12}\text{N}_2$  requires 160.1001.

### **(Methyl-phenyl-amino)acetonitrile**

Known compound; the NMR spectroscopic data agree with those given in lit.<sup>S3</sup>.  $\delta_{\text{H}}(\text{CDCl}_3, 300 \text{ MHz})$  3.00 (s, 3 H), 4.16 (s, 2 H), 6.85-6.94 (m, 3 H), 7.28-7.33 ppm (m, 2 H);  $\delta_{\text{C}}(\text{CDCl}_3, 100 \text{ MHz})$  39.3, 42.3, 114.9, 115.4, 120.2, 129.4, 147.7 ppm; HRMS  $m/z$  (EI) 146.0841,  $\text{C}_9\text{H}_{10}\text{N}_2$  requires 146.0844.

---

(S3) S. I. Murahashi, T. Nakae, H. Terai and N. Komiya, *J. Am. Chem. Soc.*, 2008, **130**, 11005–11012.

**[(4-Bromophenyl)-methyl-amino]acetonitrile.** The reaction mixture was heated to reflux.

Known compound; the NMR spectroscopic data agree with those given in lit.<sup>S3</sup>.  $\delta_{\text{H}}$ (CDCl<sub>3</sub>, 300 MHz) 2.98 (s, 3 H), 4.13 (s, 2 H), 6.72 (d, *J* 9.0 Hz, 2 H), 7.37-7.40 ppm (m, 2 H);  $\delta_{\text{C}}$ (CDCl<sub>3</sub>, 100 MHz) 39.3, 42.2, 112.6, 115.1, 116.4, 132.2, 146.7 ppm; HRMS *m/z* (EI) 223.9943, C<sub>9</sub>H<sub>9</sub>BrN<sub>2</sub> requires 223.9949.

**[(2-Bromophenyl)-methyl-amino]acetonitrile**

Viscous oil;  $\nu_{\text{max}}$ (neat/ATR probe)/cm<sup>-1</sup> 2956, 2887, 2802, 2232 (C≡N), 1586, 1473, 1439, 1415, 1337, 1325, 1222, 1177, 1111, 1023, 987, 919, 871, 766, 752, 272, 722 and 653;  $\delta_{\text{H}}$ (CDCl<sub>3</sub>, 300 MHz) 2.92 (s, 3 H), 4.07 (s, 2 H), 6.98-7.04 (m, 1 H), 7.25-7.35 (m, 2 H), 7.55-7.58 ppm (m, 1 H);  $\delta_{\text{C}}$ (CDCl<sub>3</sub>, 100 MHz) 40.6, 44.8, 115.1, 119.7, 122.8, 126.3, 128.5, 133.9, 147.3 ppm; HRMS *m/z* (EI) 223.9942, C<sub>9</sub>H<sub>9</sub>BrN<sub>2</sub> requires 223.9949; Anal. Calcd for C<sub>9</sub>H<sub>9</sub>BrN<sub>2</sub>: C, 48.03; H, 4.03; N, 12.45. Found: C, 48.10; H, 3.70; N, 12.41.

**[(4-Ethynylphenyl)-methyl-amino]acetonitrile.** The reaction mixture was heated to reflux.

Viscous oil;  $\nu_{\text{max}}$ (neat/ATR probe)/cm<sup>-1</sup> 3279 (≡C-H), 3042, 2916, 2823, 2240 (C≡N), 2101 (C≡C), 1671, 1605, 1512, 1360, 1332, 1246, 1181, 1113, 997, 924 and 819;  $\delta_{\text{H}}$ (CDCl<sub>3</sub>, 200 MHz) 2.99 (s, 1 H), 3.03 (s, 3 H), 4.18 (s, 2 H), 6.75 (d, *J* 9.0 Hz, 2 H), 7.42 ppm (d, *J* 9.0 Hz, 2 H);  $\delta_{\text{C}}$ (CDCl<sub>3</sub>, 100 MHz) 37.7, 40.5, 76.0, 84.7, 113.5, 113.9, 115.1, 133.5, 148.5 ppm; HRMS *m/z* (EI) 170.0839, C<sub>11</sub>H<sub>10</sub>N<sub>2</sub> requires 170.0844.

**[Methyl-(4-nitrophenyl)-amino]acetonitrile.** The reaction mixture was heated to reflux.

Known compound; the NMR spectroscopic data agree with those given in lit.<sup>S4</sup>. Solid, mp 112.5-113.4 °C (lit.,<sup>S4</sup> 114 °C);  $\delta_{\text{H}}$ (CDCl<sub>3</sub>, 400 MHz) 3.17 (s, 3 H), 4.26 (s, 2 H), 6.79 (d, *J* 8.0 Hz, 2 H), 8.19 ppm (d, *J* 8.0 Hz, 2 H);  $\delta_{\text{C}}$ (CDCl<sub>3</sub>, 100 MHz) 39.3, 41.1, 112.3, 114.5, 126.0, 139.9, 152.0 ppm; HRMS *m/z* (EI) 191.0691, C<sub>9</sub>H<sub>9</sub>N<sub>3</sub>O<sub>2</sub> requires 191.0695.

**[Methyl-(3-nitrophenyl)-amino]acetonitrile**

Solid, mp 99.3-99.5 °C (from Et<sub>2</sub>O/pentane);  $\nu_{\text{max}}$ (neat/ATR probe)/cm<sup>-1</sup> 3099, 3042, 2920, 2240 (C≡N), 1617, 1520, 1337, 1259, 1221, 1132, 1015, 881, 860, 789, 782, 737 and 667;  $\delta_{\text{H}}$ (CDCl<sub>3</sub>, 300 MHz) 3.11 (s, 3 H), 4.25 (s, 2 H), 7.09-7.13 (m, 1 H), 7.45 (t, *J* 8.3 Hz, 1 H),

---

(S4) M. Barzoukas, D. Josse, P. Fremaux, J. Zyss, J. F. Nicoud and J. O. Morley, *J. Opt. Soc. Am. B*, 1987, **4**, 977-986.

7.65-7.76 ppm (m, 2 H);  $\delta_{\text{C}}$ (CDCl<sub>3</sub>, 100 MHz) 39.3, 41.7, 108.7, 114.4, 114.7, 119.6, 130.3, 148.3, 149.3 ppm; HRMS  $m/z$  (EI) 191.0689, C<sub>9</sub>H<sub>9</sub>N<sub>3</sub>O<sub>2</sub> requires 191.0695; Anal. Calcd for C<sub>9</sub>H<sub>9</sub>N<sub>3</sub>O<sub>2</sub>: C, 56.54; H, 4.74; N, 21.98. Found: C, 56.40; H, 4.73; N, 21.45.

### **2-Phenyl-1,2,3,4-tetrahydroisoquinoline-1-carbonitrile**

Known compound; the NMR spectroscopic data agree with those given in lit.<sup>S3</sup>.  $\delta_{\text{H}}$ (CDCl<sub>3</sub>, 200 MHz) 2.91-3.24 (m, 2 H), 3.41-3.55 (m, 1 H), 3.71-3.82 (m, 1 H), 5.50 (s, 1 H), 6.97-7.10 (m, 3 H), 7.24-7.39 ppm (m, 6 H);  $\delta_{\text{C}}$ (CDCl<sub>3</sub>, 100 MHz) 28.1, 44.1, 53.4, 117.6, 117.7, 121.9, 126.8, 127.1, 128.8, 129.3, 129.5, 129.6, 134.1, 148.1 ppm; HRMS  $m/z$  (EI) 234.1146, C<sub>16</sub>H<sub>14</sub>N<sub>2</sub> requires 234.1157.

### **2-(4-Methoxyphenyl)-1,2,3,4-tetrahydroisoquinoline-1-carbonitrile**

Solid;  $\nu_{\text{max}}$ (neat/ATR probe)/cm<sup>-1</sup> 2996, 2933, 2837, 2221 (C≡N), 1647, 1510, 1465, 1454, 1259, 1245, 1206, 1179, 1030, 829 and 733;  $\delta_{\text{H}}$ (CDCl<sub>3</sub>, 400 MHz) 2.91-2.96 (m, 1 H), 3.12-3.21 (m, 1 H), 3.40-3.47 (m, 1 H), 3.55-3.59 (m, 1 H), 3.80 (s, 3 H), 5.36 (s, 1 H), 6.90-6.94 (m, 2 H), 7.07-7.11 (m, 2 H), 7.22-7.33 ppm (m, 4 H);  $\delta_{\text{C}}$ (CDCl<sub>3</sub>, 100 MHz) 28.7, 44.9, 55.5, 55.6, 114.8, 117.6, 121.0, 126.7, 127.1, 128.6, 129.4, 129.6, 134.3, 142.6, 155.7 ppm; HRMS  $m/z$  (EI) 264.1250, C<sub>17</sub>H<sub>16</sub>N<sub>2</sub>O requires 264.1263; Anal. Calcd for C<sub>17</sub>H<sub>16</sub>N<sub>2</sub>O: C, 77.25; H, 6.10; N, 10.60. Found: C, 76.88; H, 6.51; N, 10.43.

### **1-Phenylpiperidine-2-carbonitrile** from the reaction without methanol.

Known compound; the NMR spectroscopic data agree with those given in lit.<sup>S3,S5</sup>.  $\delta_{\text{H}}$ (CDCl<sub>3</sub>, 400 MHz) 1.66-1.73 (m, 2 H), 1.84-1.87 (m, 2 H), 1.99-2.03 (m, 2 H), 3.00-3.06 (m, 1 H), 3.46 (d,  $J$  12 Hz, 1 H), 4.63 (s, 1 H), 6.98-7.02 (m, 3 H), 7.25-7.34 ppm (m, 2 H);  $\delta_{\text{C}}$ (CDCl<sub>3</sub>, 100 MHz) 20.1, 25.0, 29.1, 46.4, 51.9, 117.1, 118.1, 122.0, 129.2, 149.6 ppm; HRMS  $m/z$  (EI) 186.1153, C<sub>12</sub>H<sub>14</sub>N<sub>2</sub> requires 186.1157.

Additional NMR signals of unidentified byproducts:  $\delta_{\text{H}}$ (CDCl<sub>3</sub>, 400 MHz) 1.3-1.5 (m), 5.93 (s), 6.80-6.82 (m);  $\delta_{\text{C}}$ (CDCl<sub>3</sub>, 100 MHz) 16.0, 21.6, 22.3, 69.4, 86.9, 113.1, 117.4, 121.9, 129.4, 146.5, 150.6 ppm. One of the byproducts is tentatively assigned to the dicyanation product 1-phenylpiperidine-2,6-dicarbonitrile<sup>S6</sup> based on HRMS [ $m/z$  (EI) 211.1106,

---

(S5) E. Le Gall, J.-P. Hurvois, T. Renaud, C. Moinet, A. Tallec, P. Uriac, S. Sinbandhit and L. Toupet, *Liebigs Ann./Recueil*, 1997, 2089–2101.

(S6) K. Takahashi, T. Mikajiri, H. Kurita, K. Ogura and H. Iida, *J. Org. Chem.*, 1985, **50**, 4372–4375.

$C_{13}H_{13}N_3$  requires 211.1109]. Because of superimposition of resonances, however, an unambiguous assignment of the signals in the NMR spectra was not possible.

**1-Phenylpyrrolidine-2-carbonitrile** from the reaction without methanol.

Known compound; the NMR spectroscopic data agree with those given in lit.<sup>S7</sup>.  $\delta_H(CDCl_3, 200\text{ MHz})$  2.07-2.34 (m, 4 H), 3.26-3.38 (m, 2 H), 4.33-4.37 (m, 1 H), 6.58-6.63 (m, 2 H), 6.74 (t,  $J$  7.4 Hz, 1 H), 7.16-7.25 ppm (m, 2 H);  $\delta_C(CDCl_3, 100\text{ MHz})$  23.9, 31.5, 47.4, 49.0, 112.6, 118.1, 119.2, 129.4, 145.1 ppm; HRMS  $m/z$  (EI) 172.0991,  $C_{11}H_{12}N_2$  requires 172.1000.

**1-Phenylpyrrolidine-2,5-dicarbonitrile** from the reaction in the presence of TMSCN (4.0 mmol). The Typical Procedure was followed to obtain the crude product which was purified by column chromatography ( $SiO_2, n$ -pentane/diethyl ether = 3:1, v/v).

Known compound (lit.<sup>S8</sup>);  $\nu_{max}(\text{neat/ATR probe})/cm^{-1}$  3075, 3050, 3003, 2930, 2233, 1597, 1504, 1347, 1338, 1323, 1269, 1251, 1180, 1160, 966, 818, 745 and 693;  $\delta_H(CDCl_3, 400\text{ MHz})$  2.56-2.63 (m, 4 H), 4.57 (t,  $J$  2.8 Hz, 2 H), 6.78-6.81 (m, 2 H), 6.96-6.99 (m, 1 H), 7.35-7.39 ppm (m, 2 H);  $\delta_C(CDCl_3, 100\text{ MHz})$  30.4, 48.9, 113.4, 117.9, 120.5, 129.9, 141.8 ppm. Attempts to elucidate the stereochemistry of the product were not made.

---

(S7) W. Liu, Y. Ma, Y. W. Yin and Y. F. Zhao, *Bull. Chem. Soc. Jpn.*, 2006, **79**, 577–579.

(S8) K. Takahashi, H. Saitoh, K. Ogura and H. Iida, *Heterocycles*, 1986, **24**, 2905–2910.

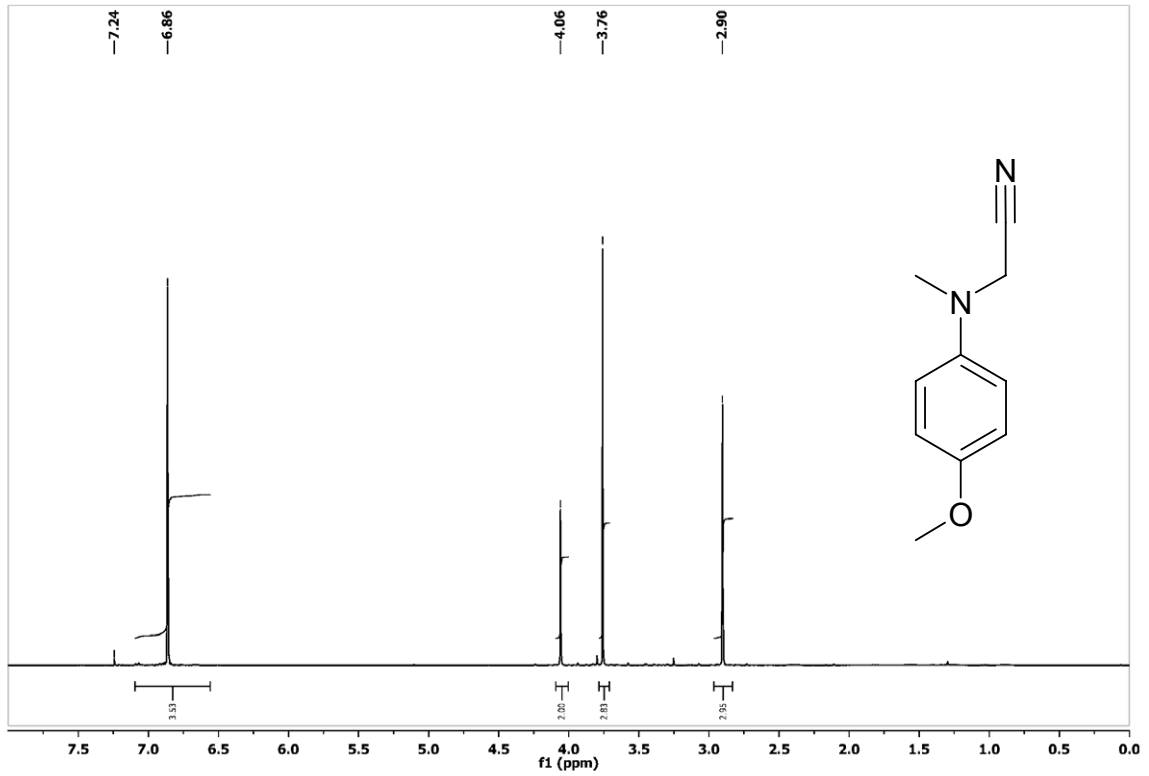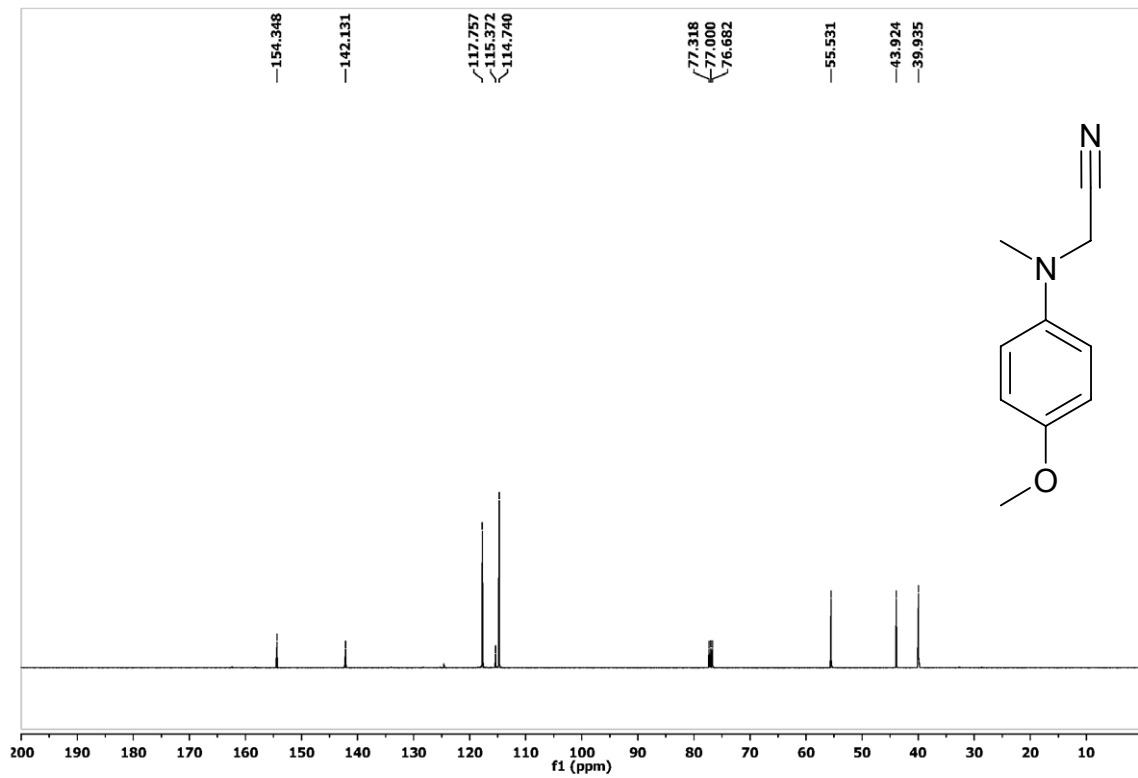

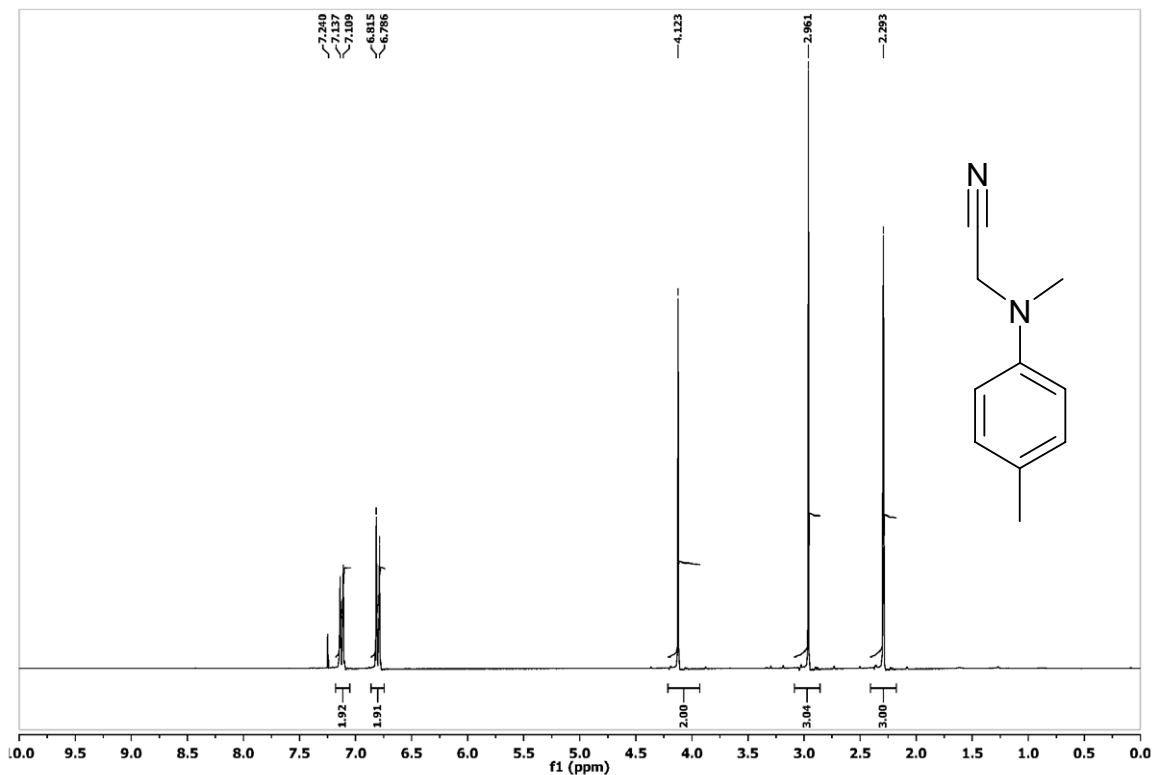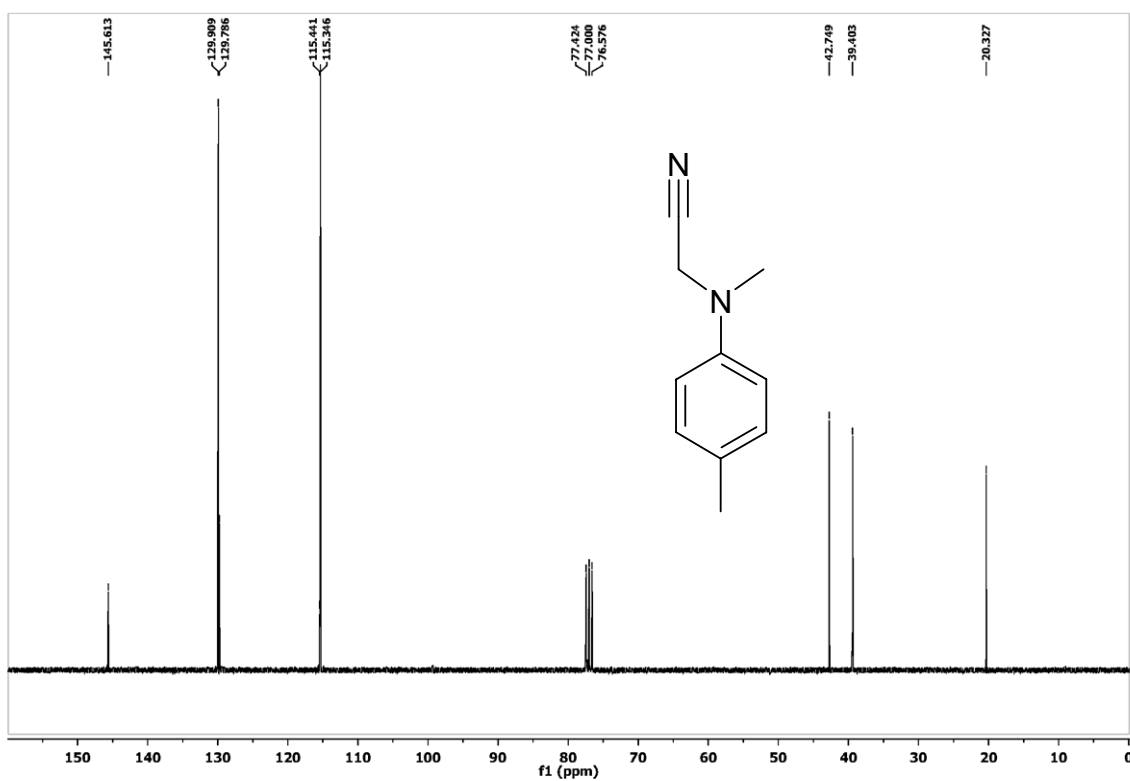



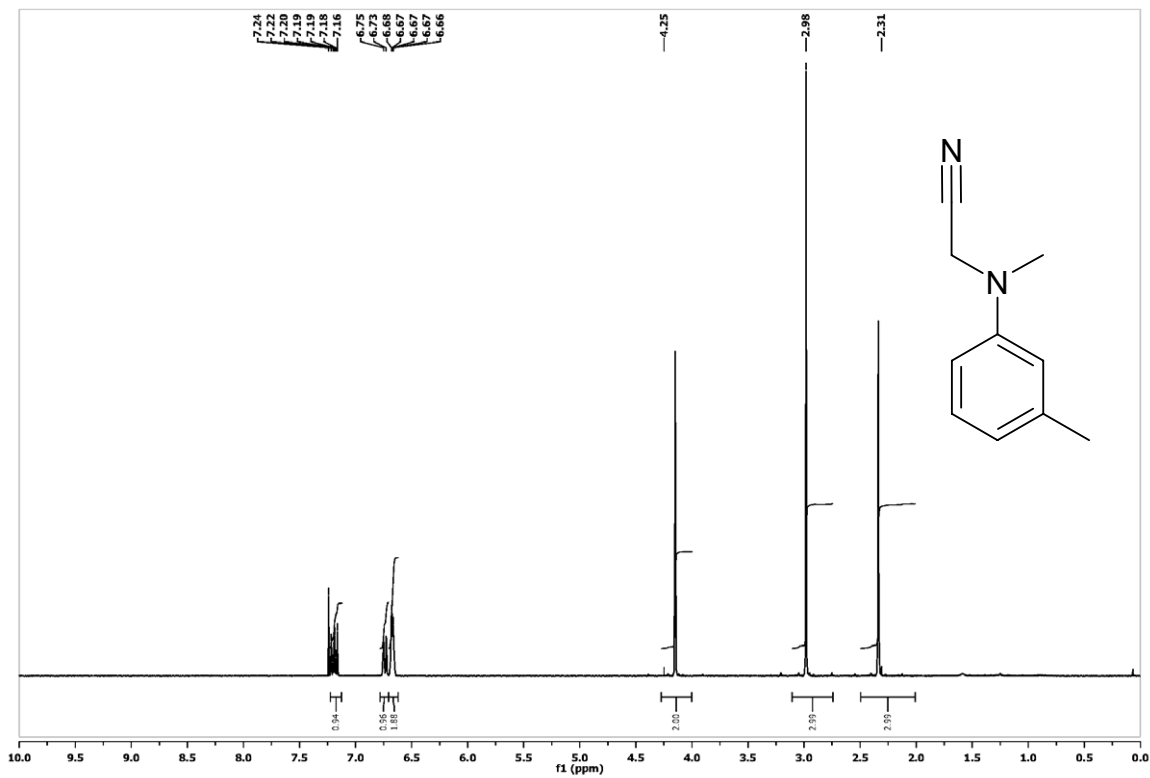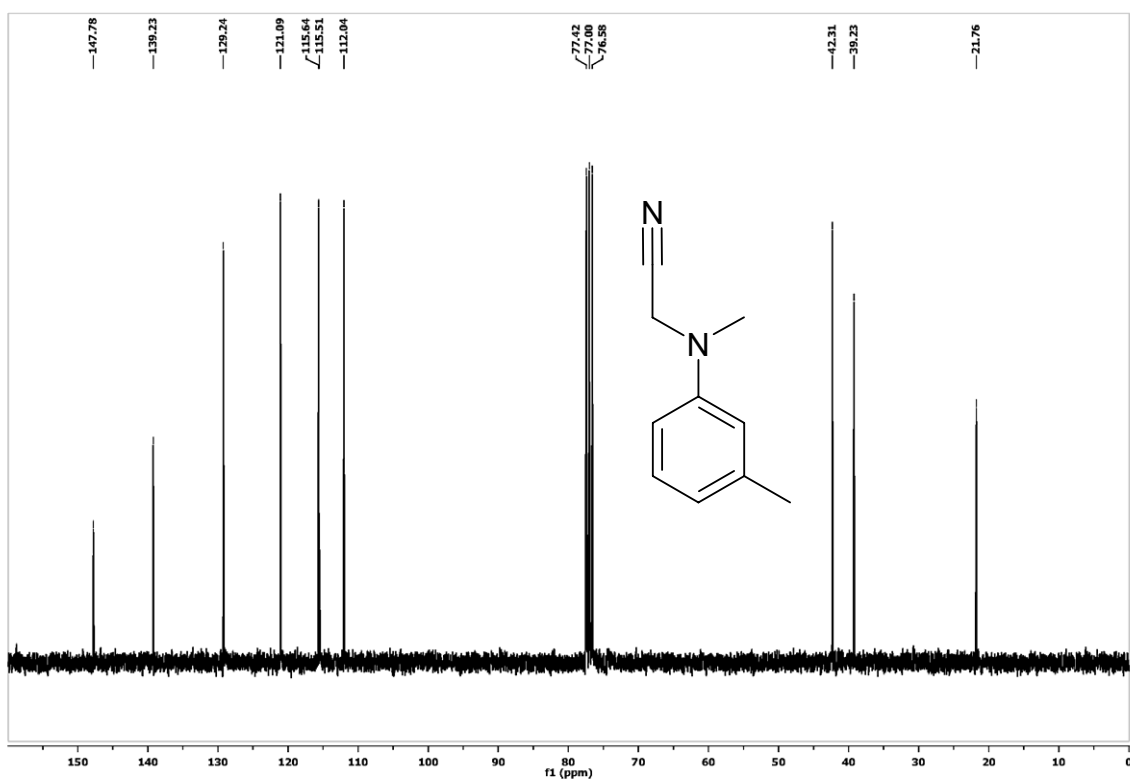

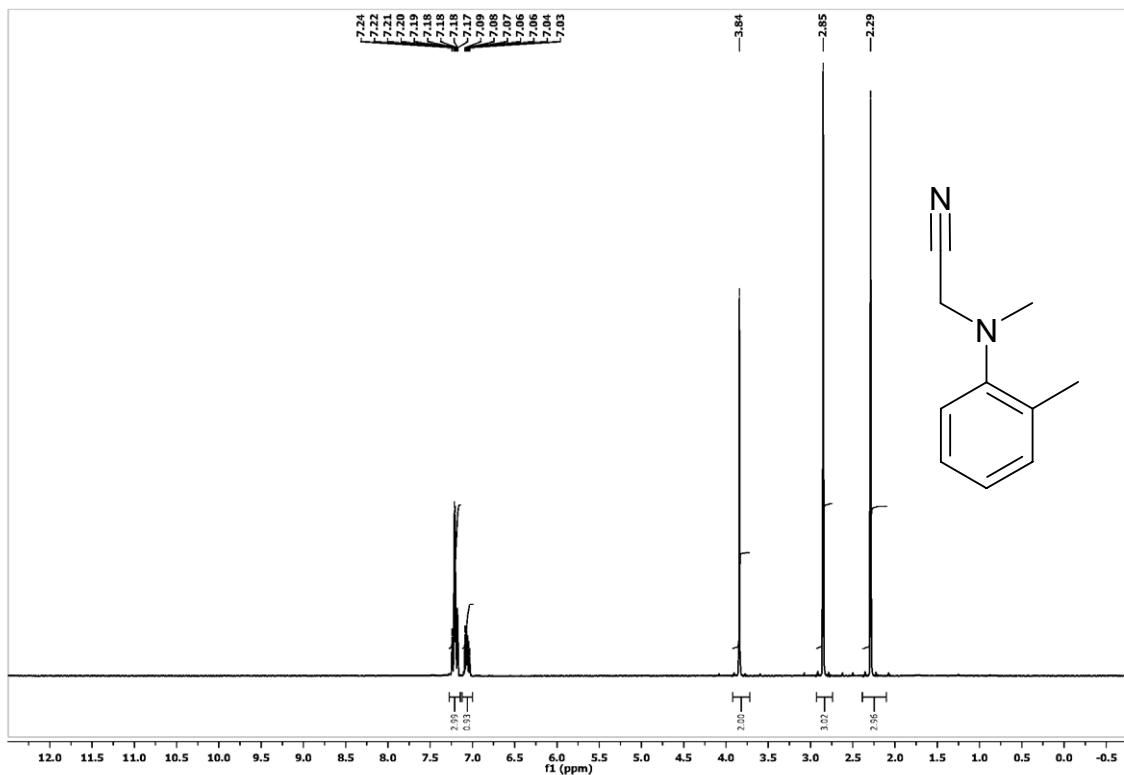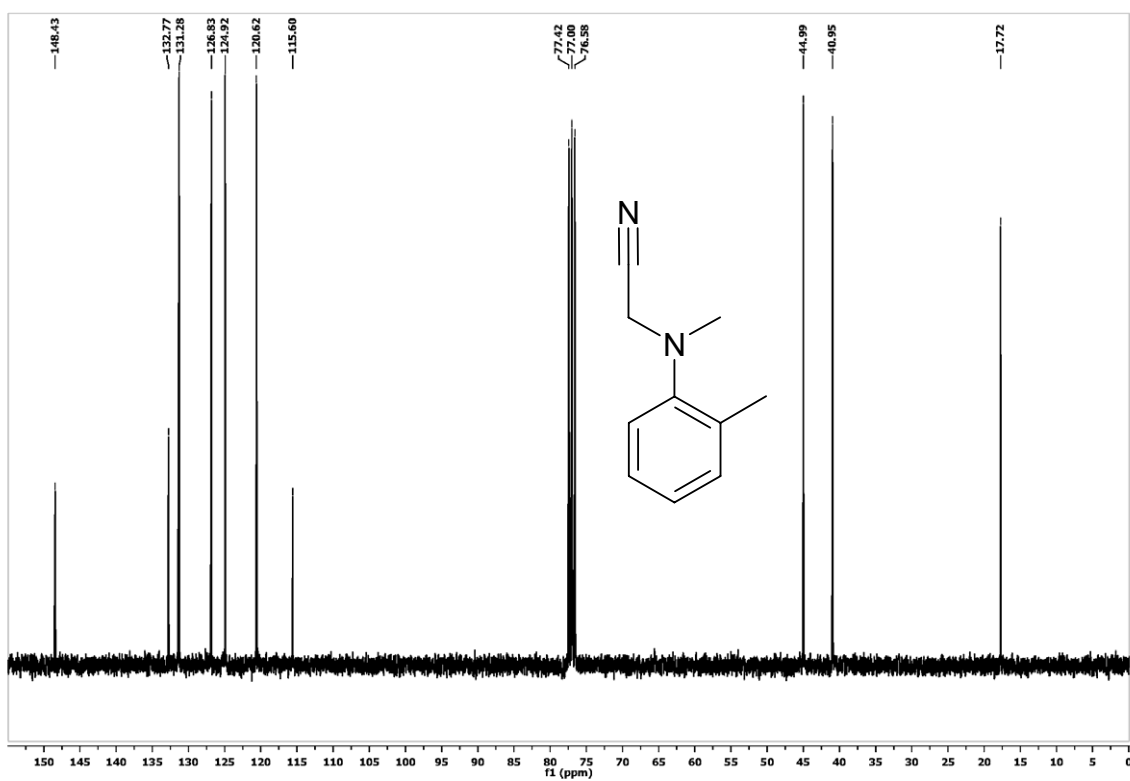

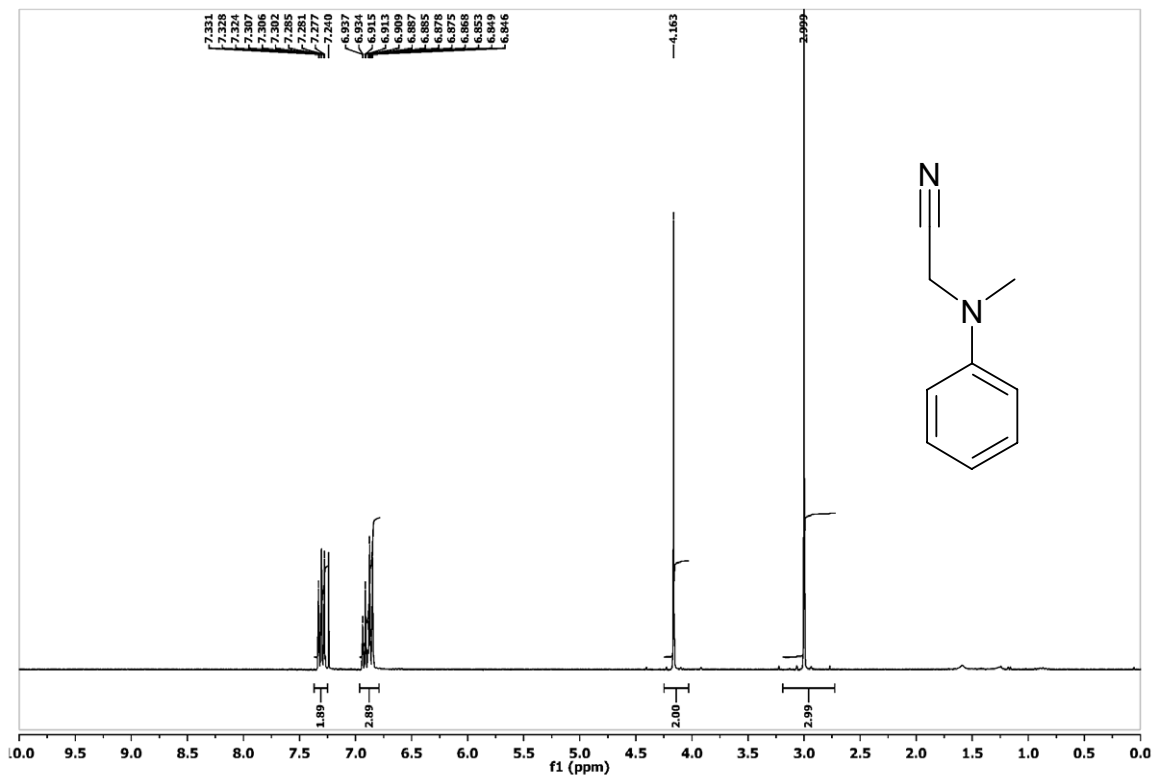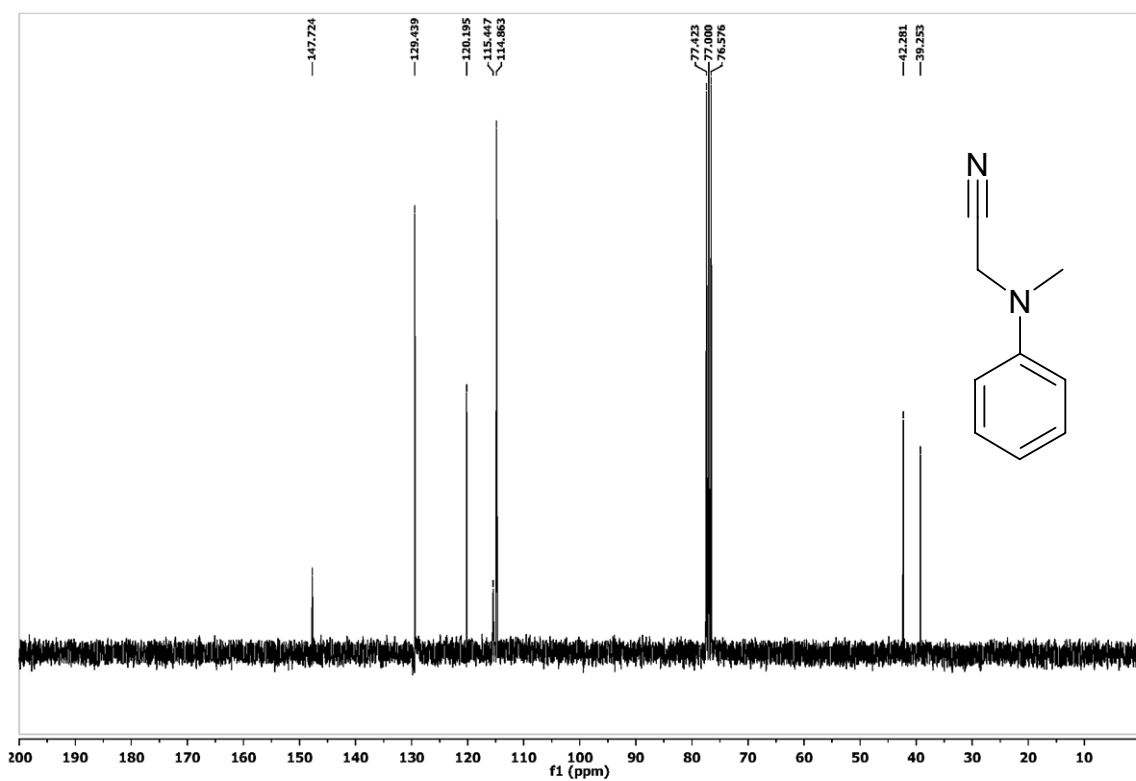

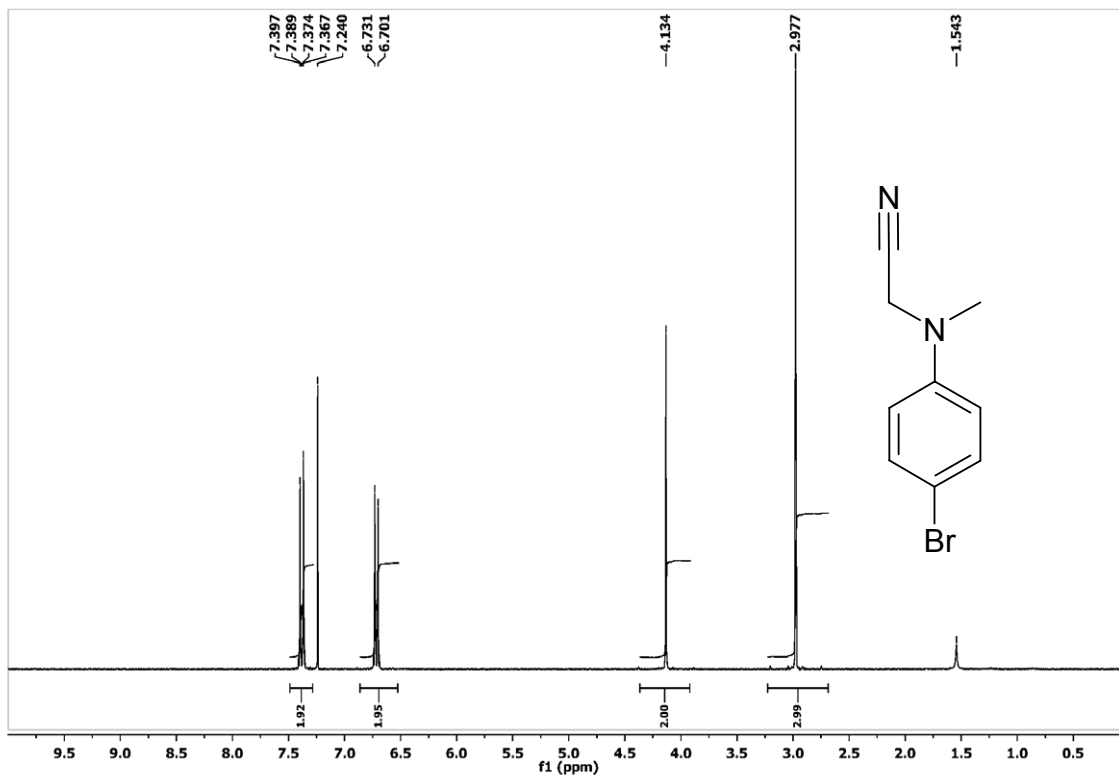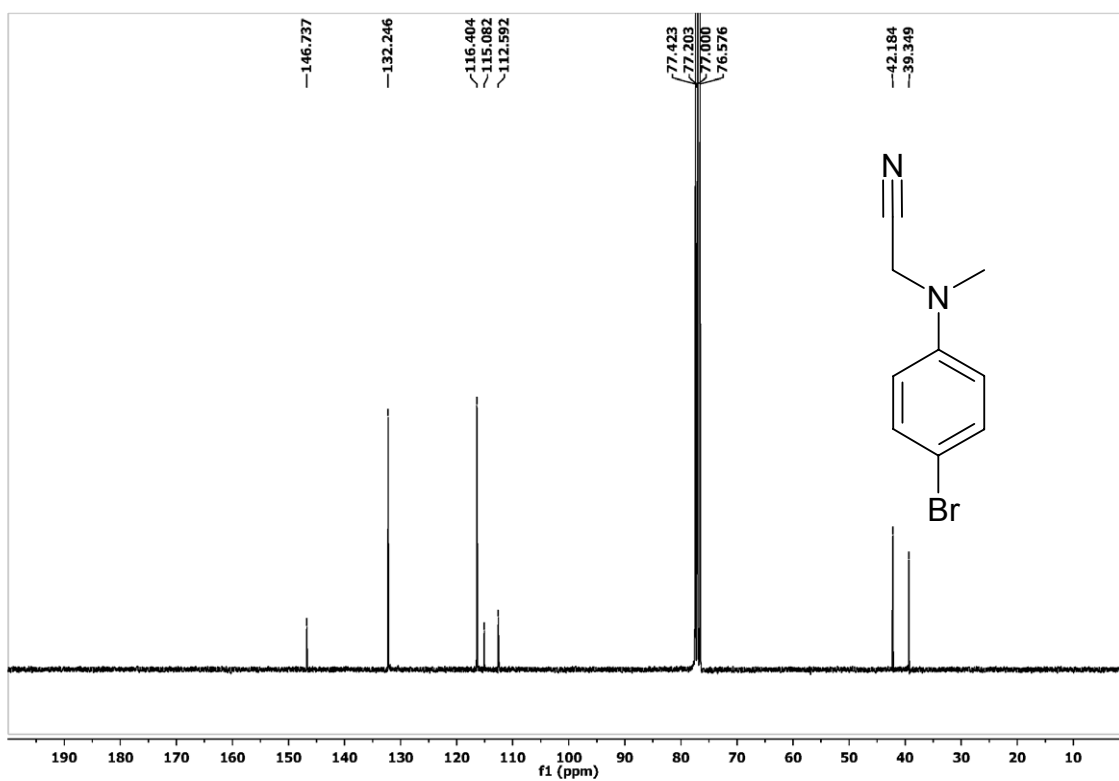

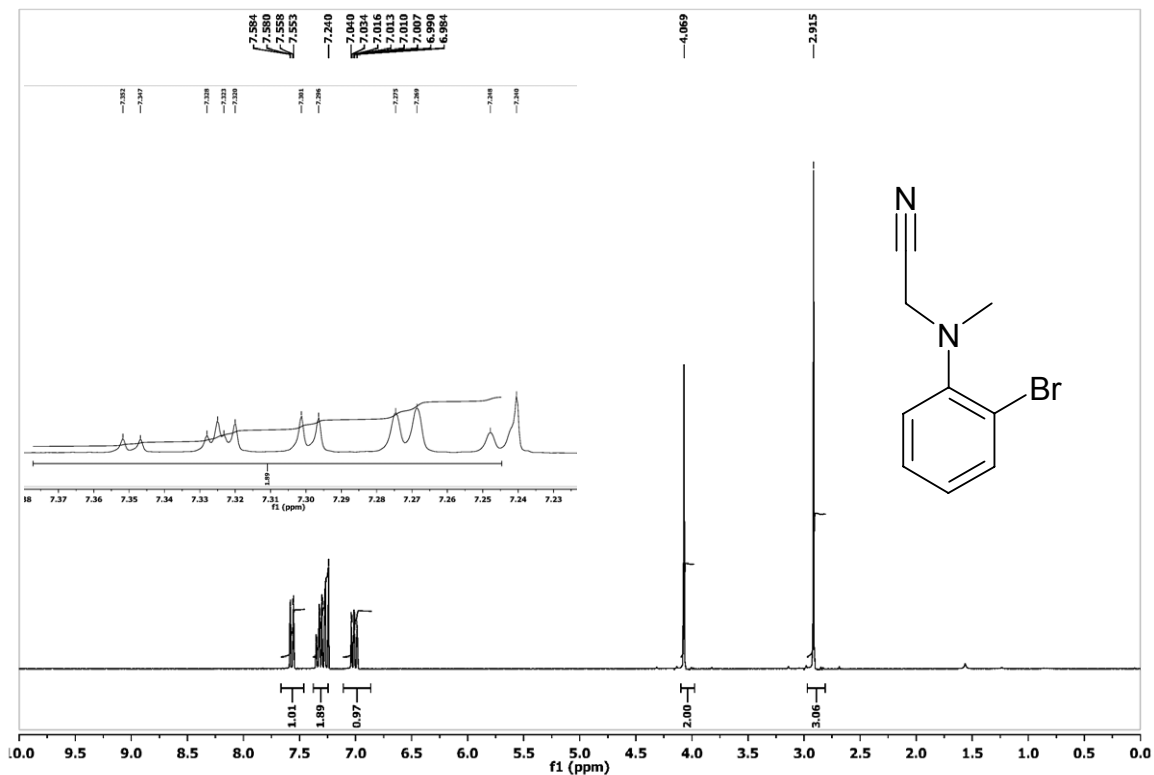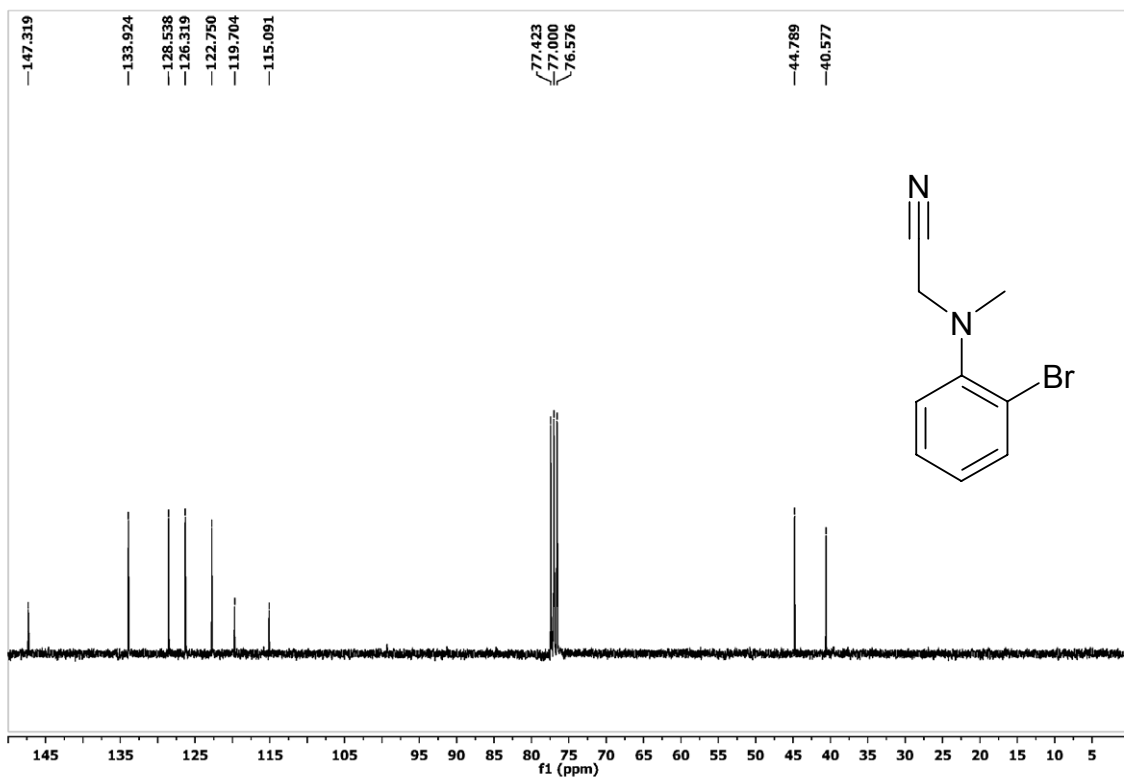

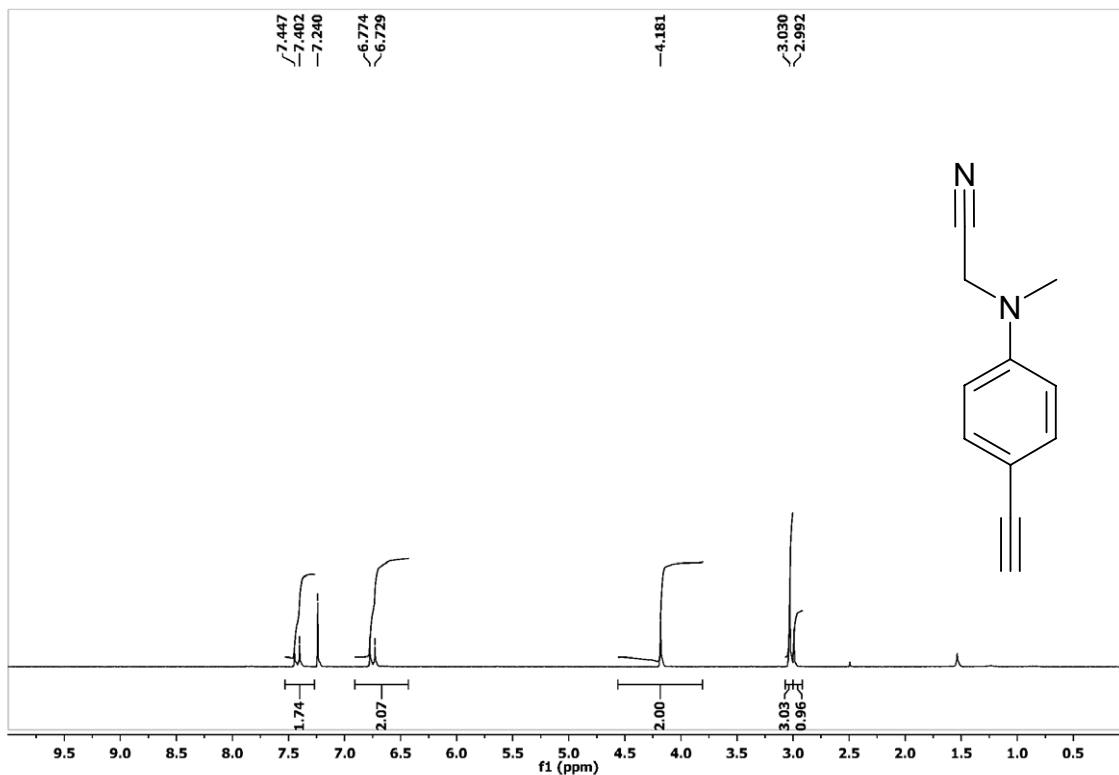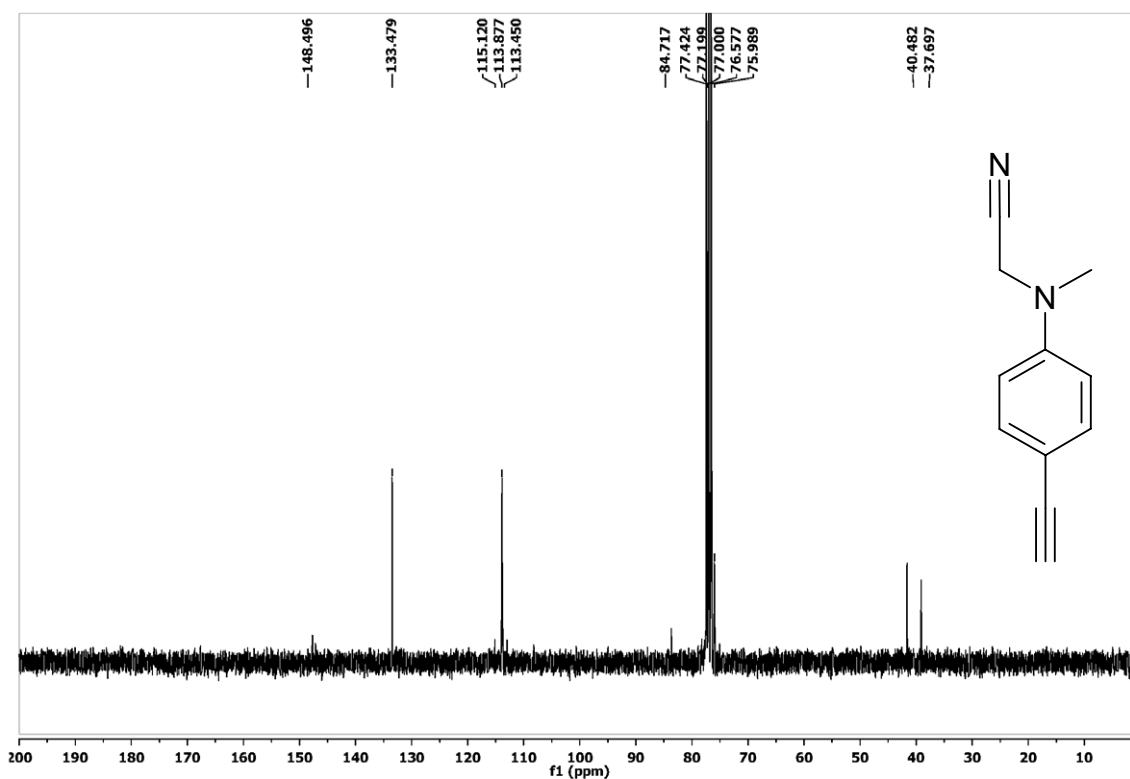

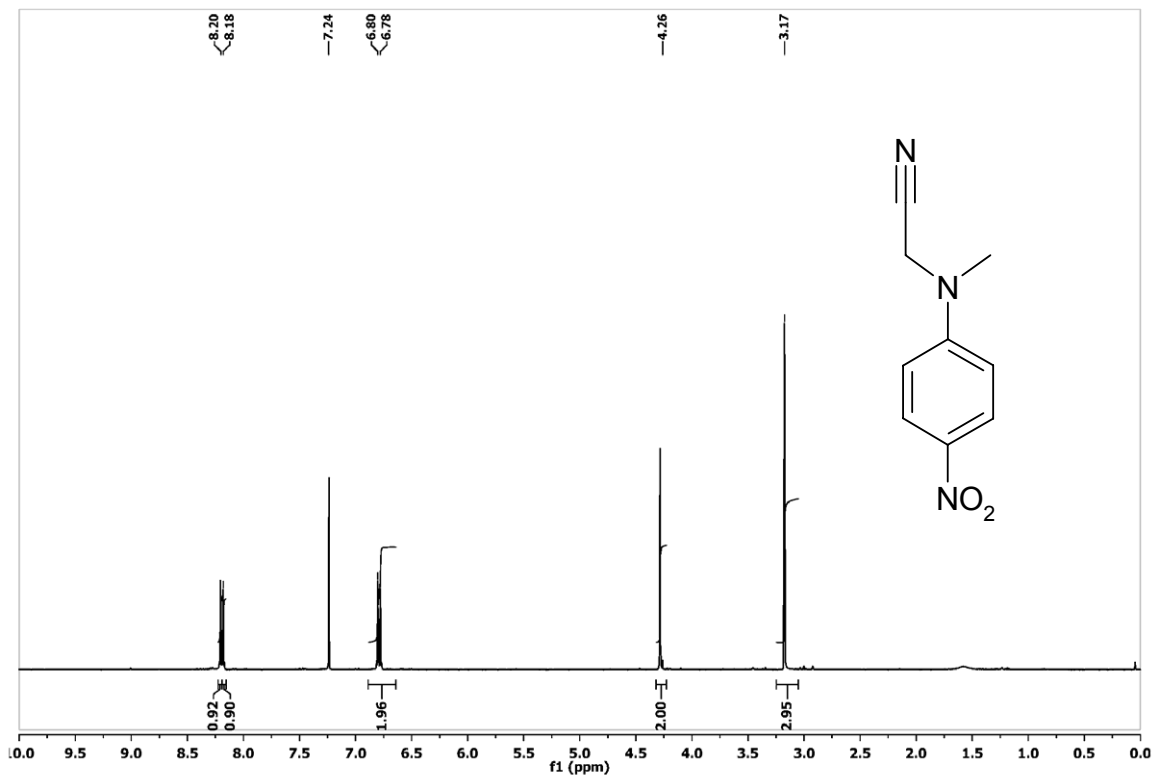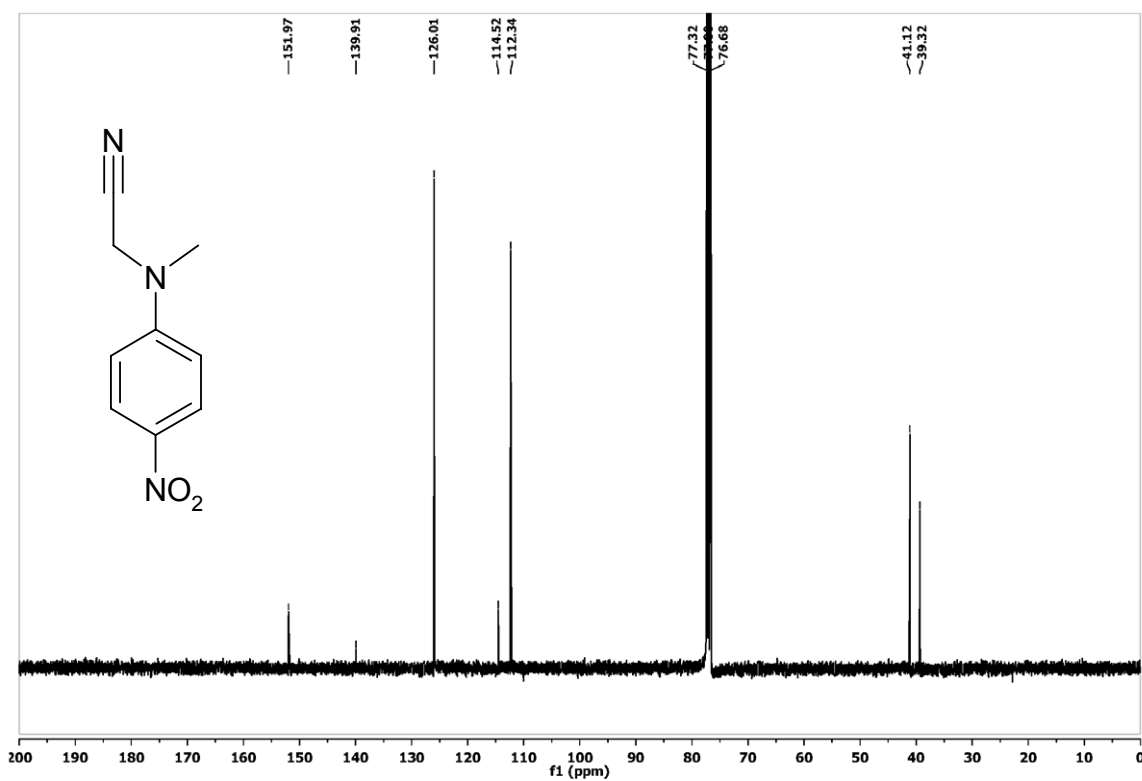

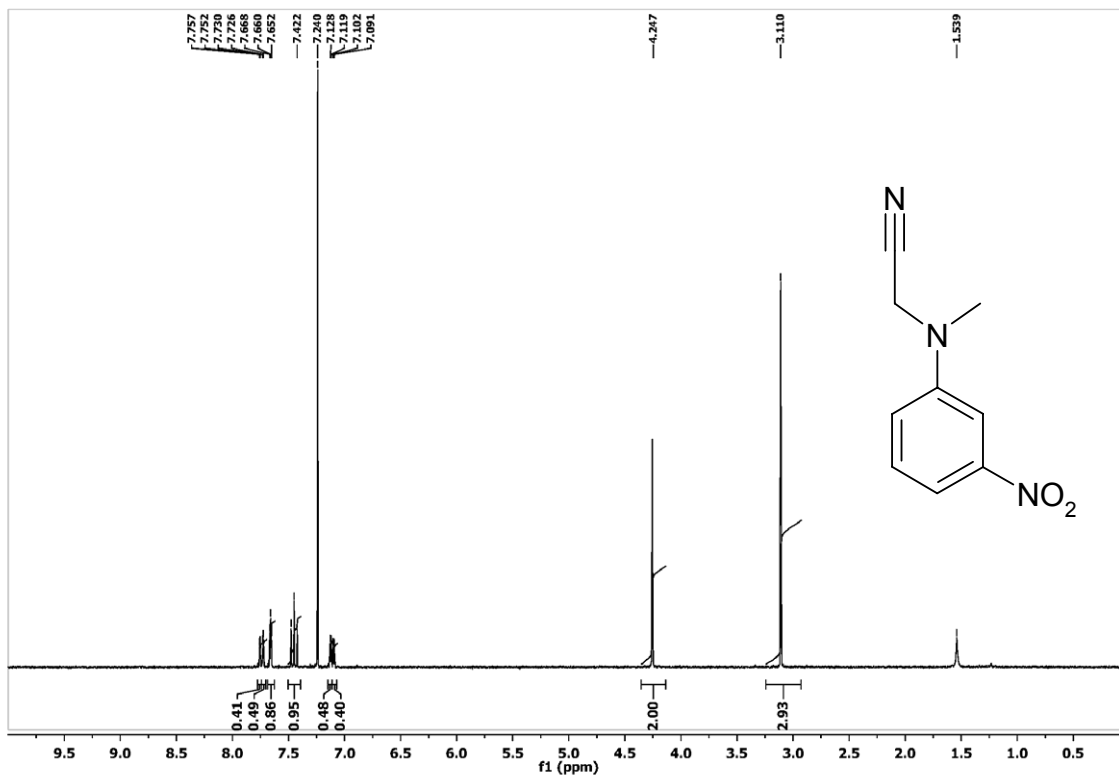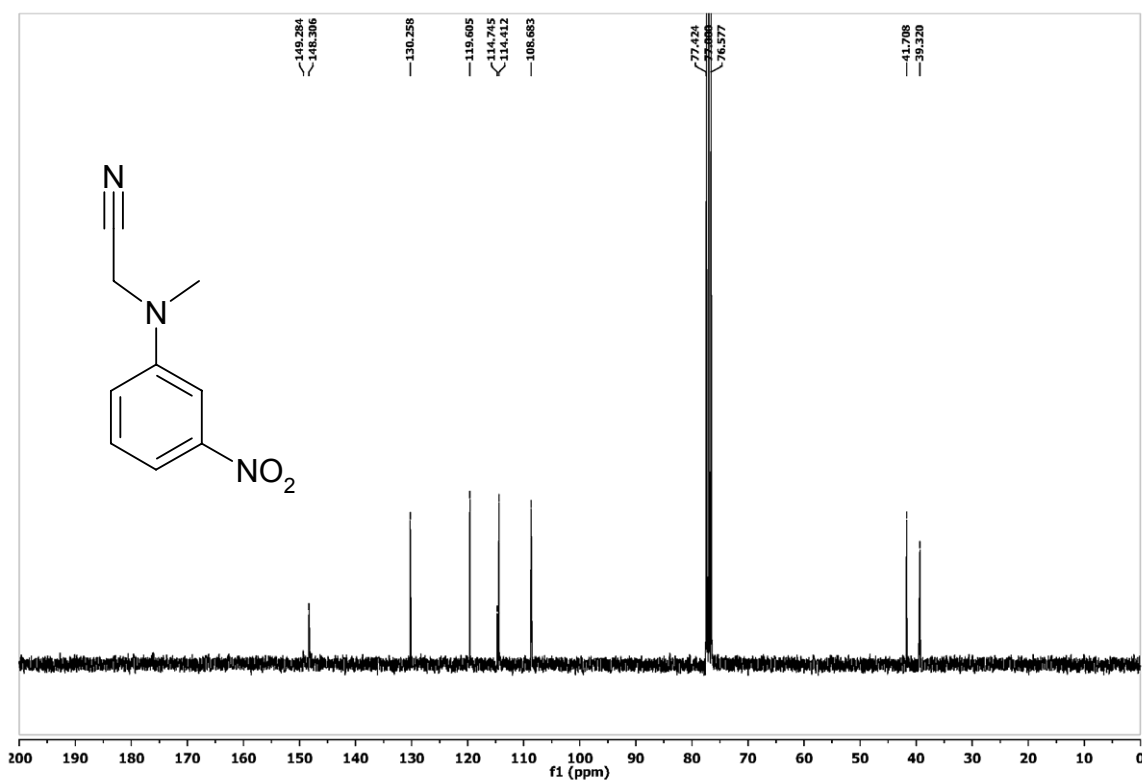



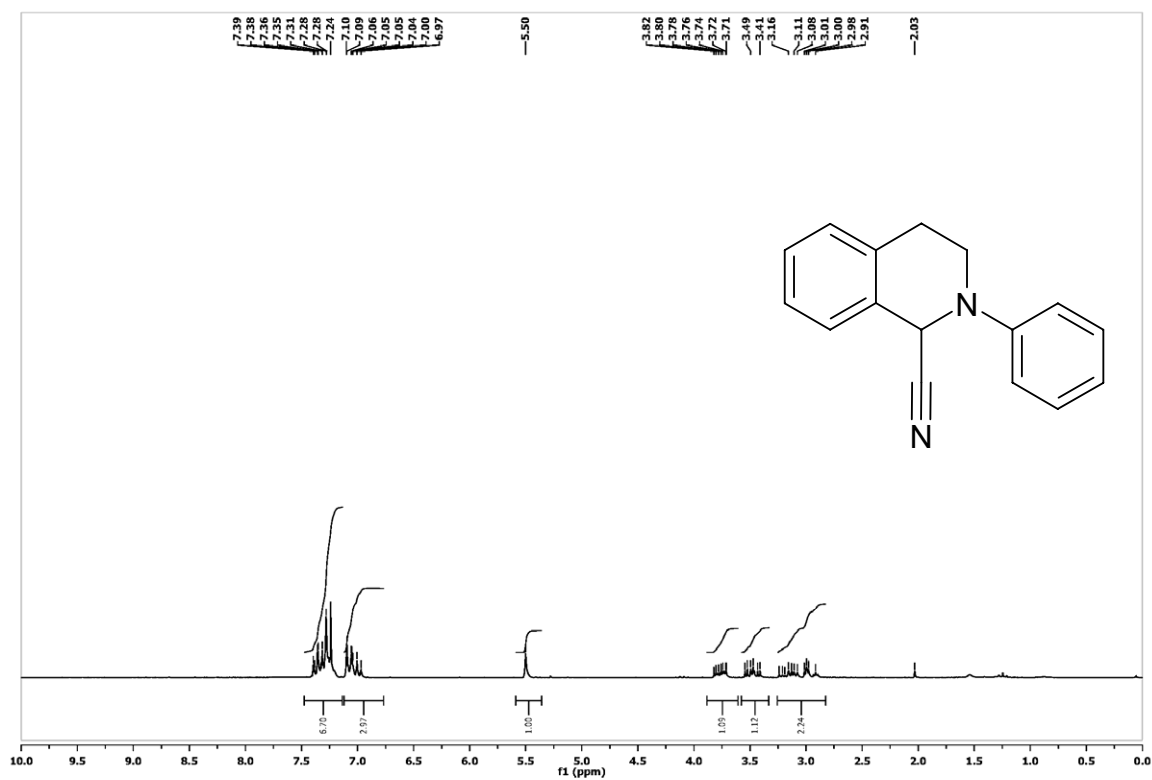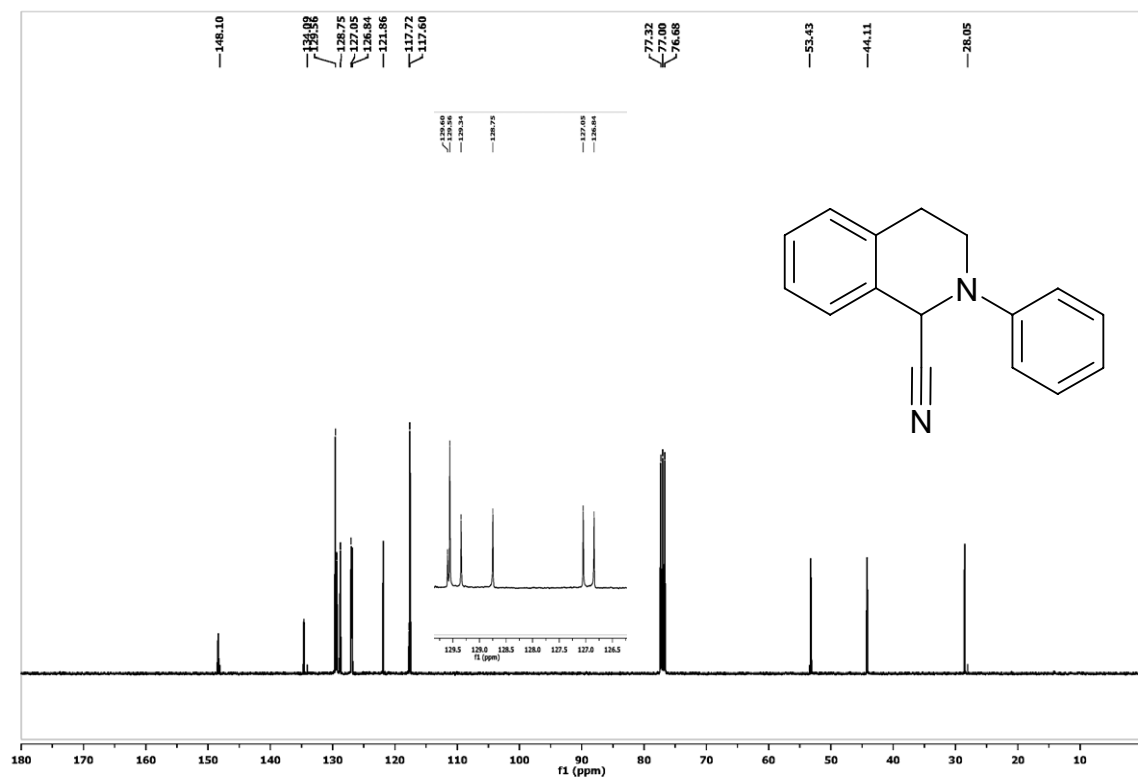

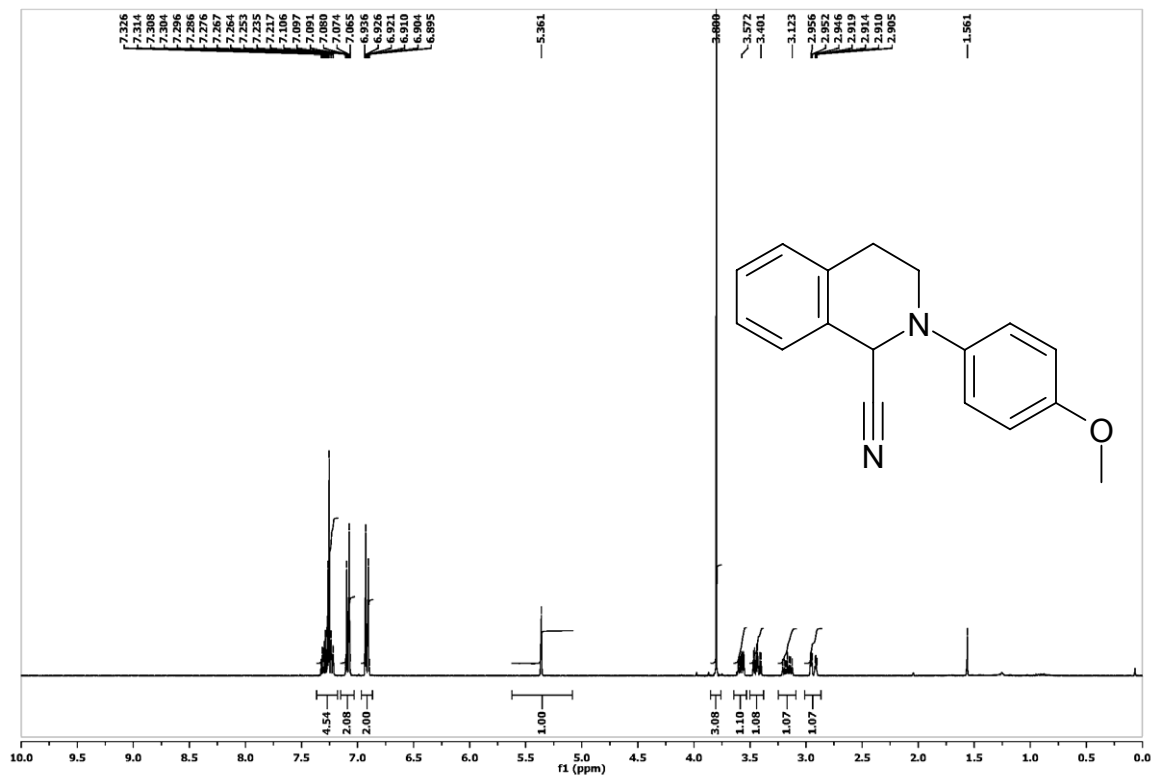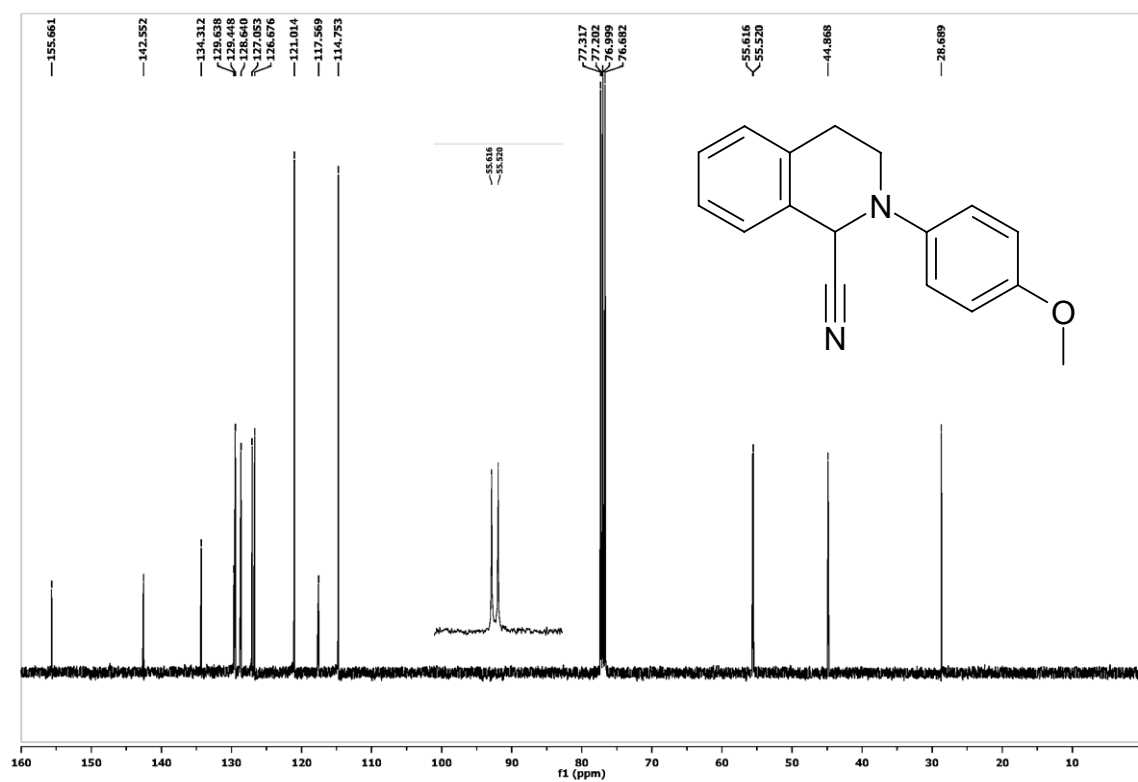

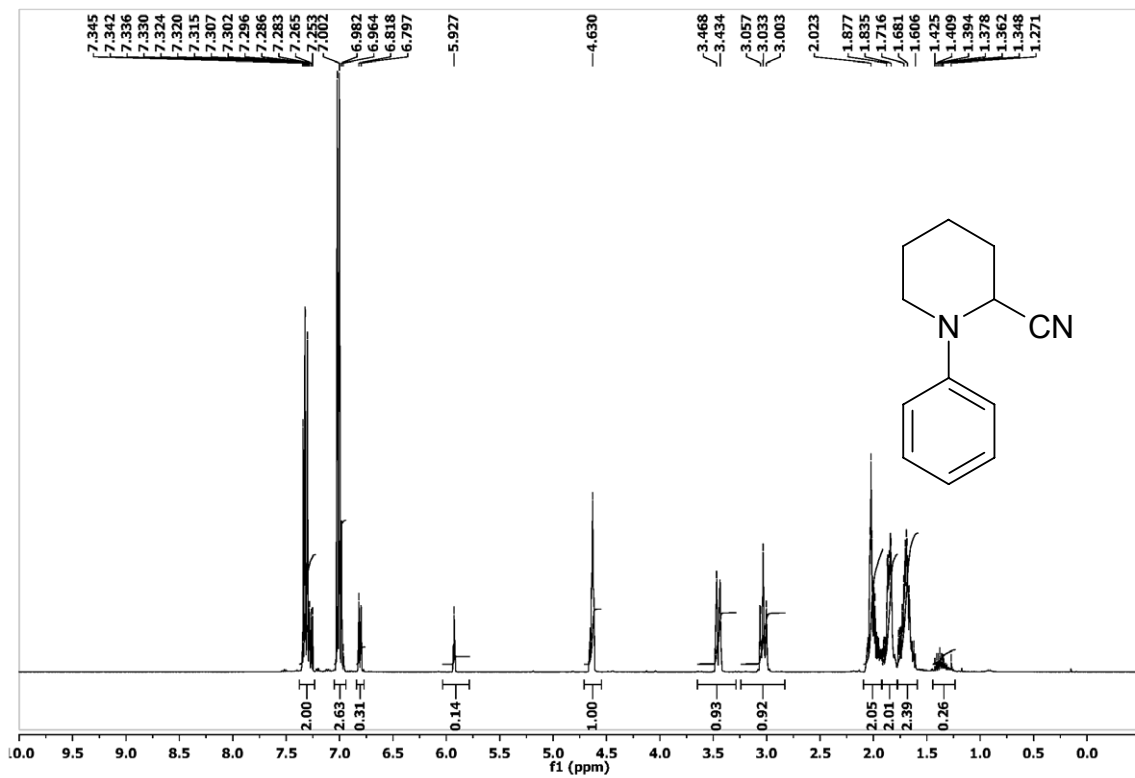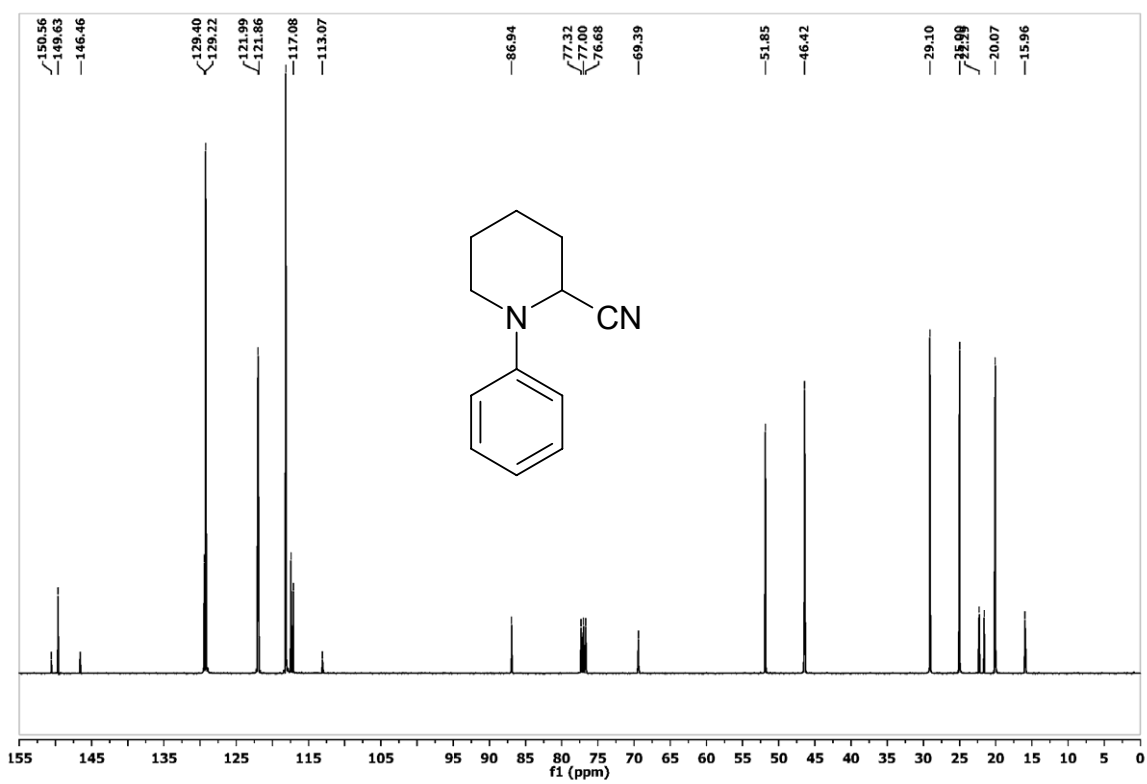

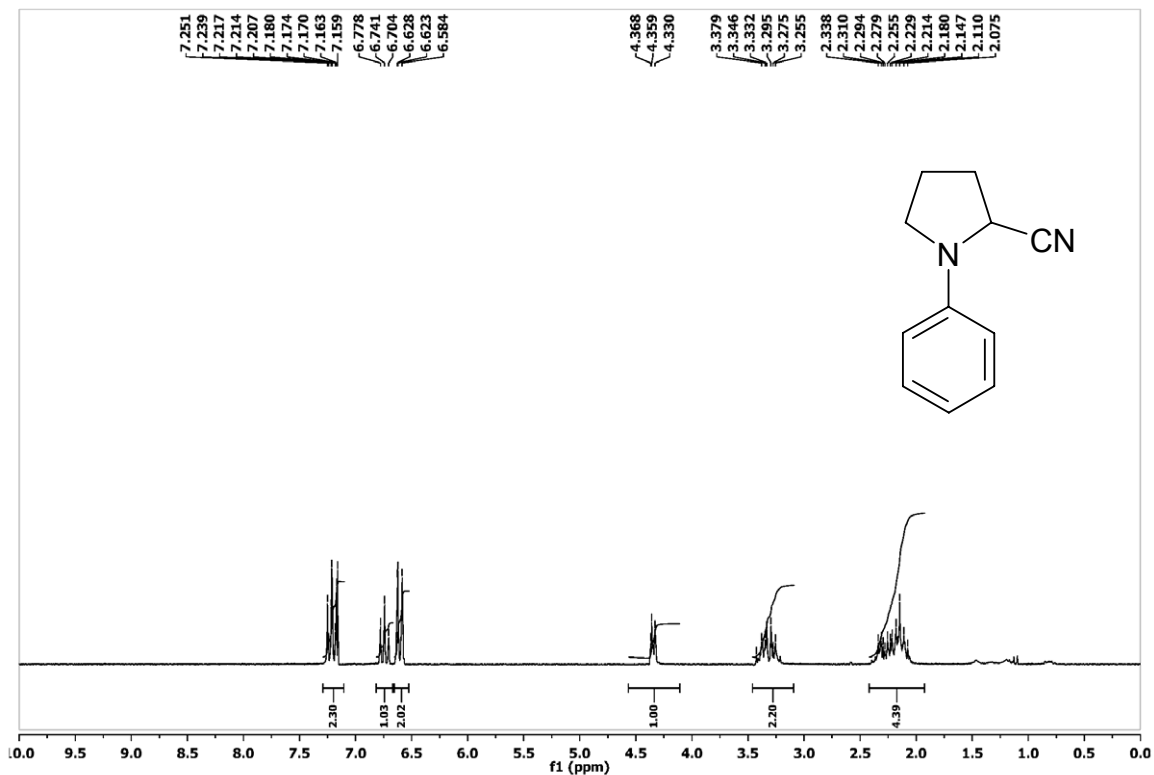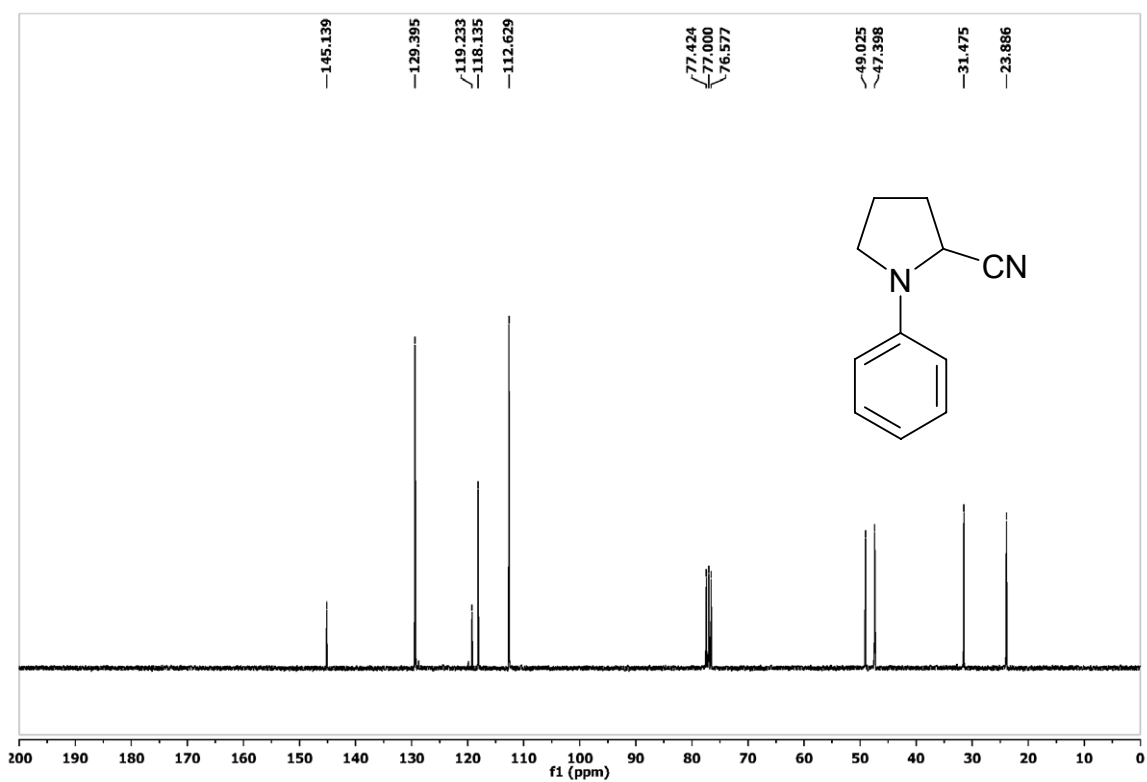

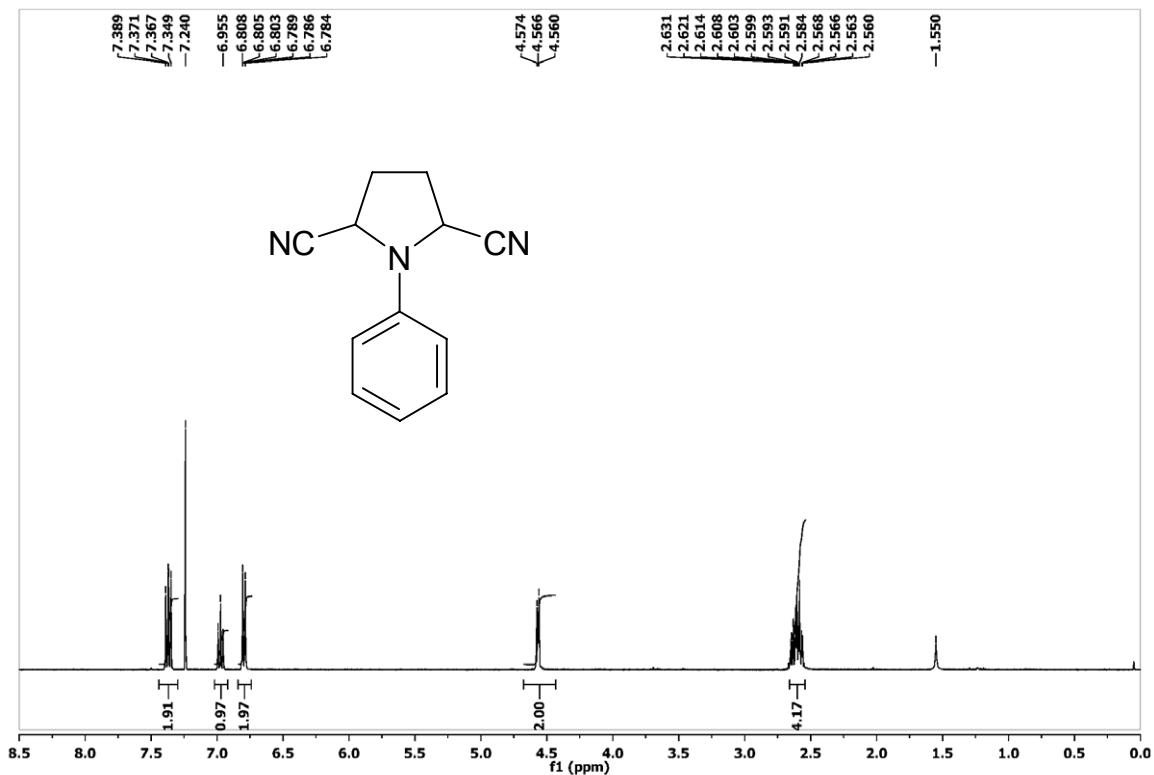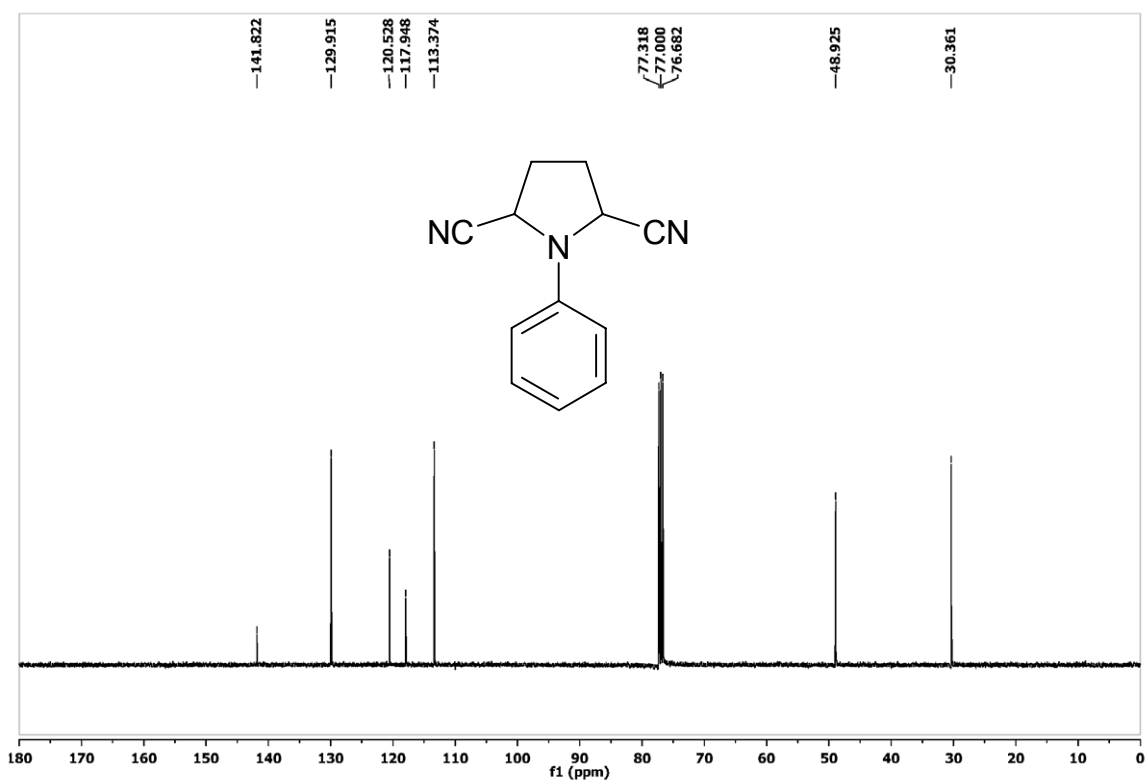

Supplement: b910548d.pdf [file b910548d.pdf]
